# Supplementary material for: Lipid Raft Integrity Is Required for Survival of Triple Negative Breast Cancer Cells
Source: PubMed Central journal article supplement — J Breast Cancer. 2016 Dec 23;19(4):372–84. doi: 10.4048/jbc.2016.19.4.372 (PMC5204043; doi:10.4048/jbc.2016.19.4.372), 2016-12-23
Supplement: jbc-19-372-s002.pdf [file jbc-19-372-s002.pdf]

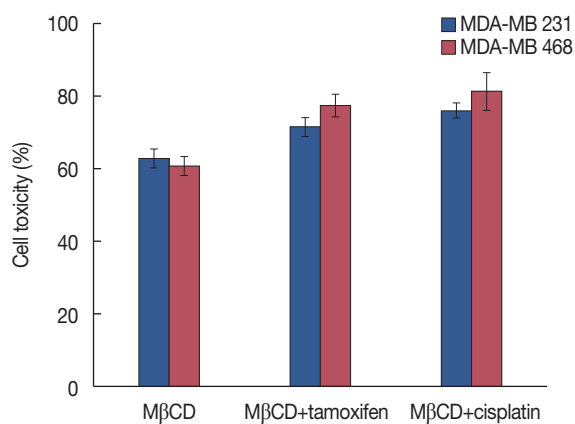

**Supplementary Figure 2.** Effect of tamoxifen and cisplatin on methyl- $\beta$ -cyclodextrin (M $\beta$ CD) induced cytotoxicity in triple negative breast cancer cell lines. MDA-MB 231 and 468 cells were treated with M $\beta$ CD (0.5 mM) alone and in combination of M $\beta$ CD (0.5 mM) with tamoxifen (5  $\mu$ M) or M $\beta$ CD (0.5 mM) with cisplatin (5  $\mu$ M) for 48 hours and cytotoxicity was measured with lactate dehydrogenase assay. The cytotoxicity was expressed as percent. The results represent the mean  $\pm$  SD of three independent experiments.
